# Supplementary material for: Phylogenomic analysis of cytochrome P450 multigene family and its differential expression analysis in pepper (Capsicum annuum L.)
Source: PubMed Central journal article supplement (PMC9763298; doi:10.3389/fpls.2022.1078377), 2022-12-06
Supplement: DataSheet_1.pdf [file DataSheet_1.pdf]

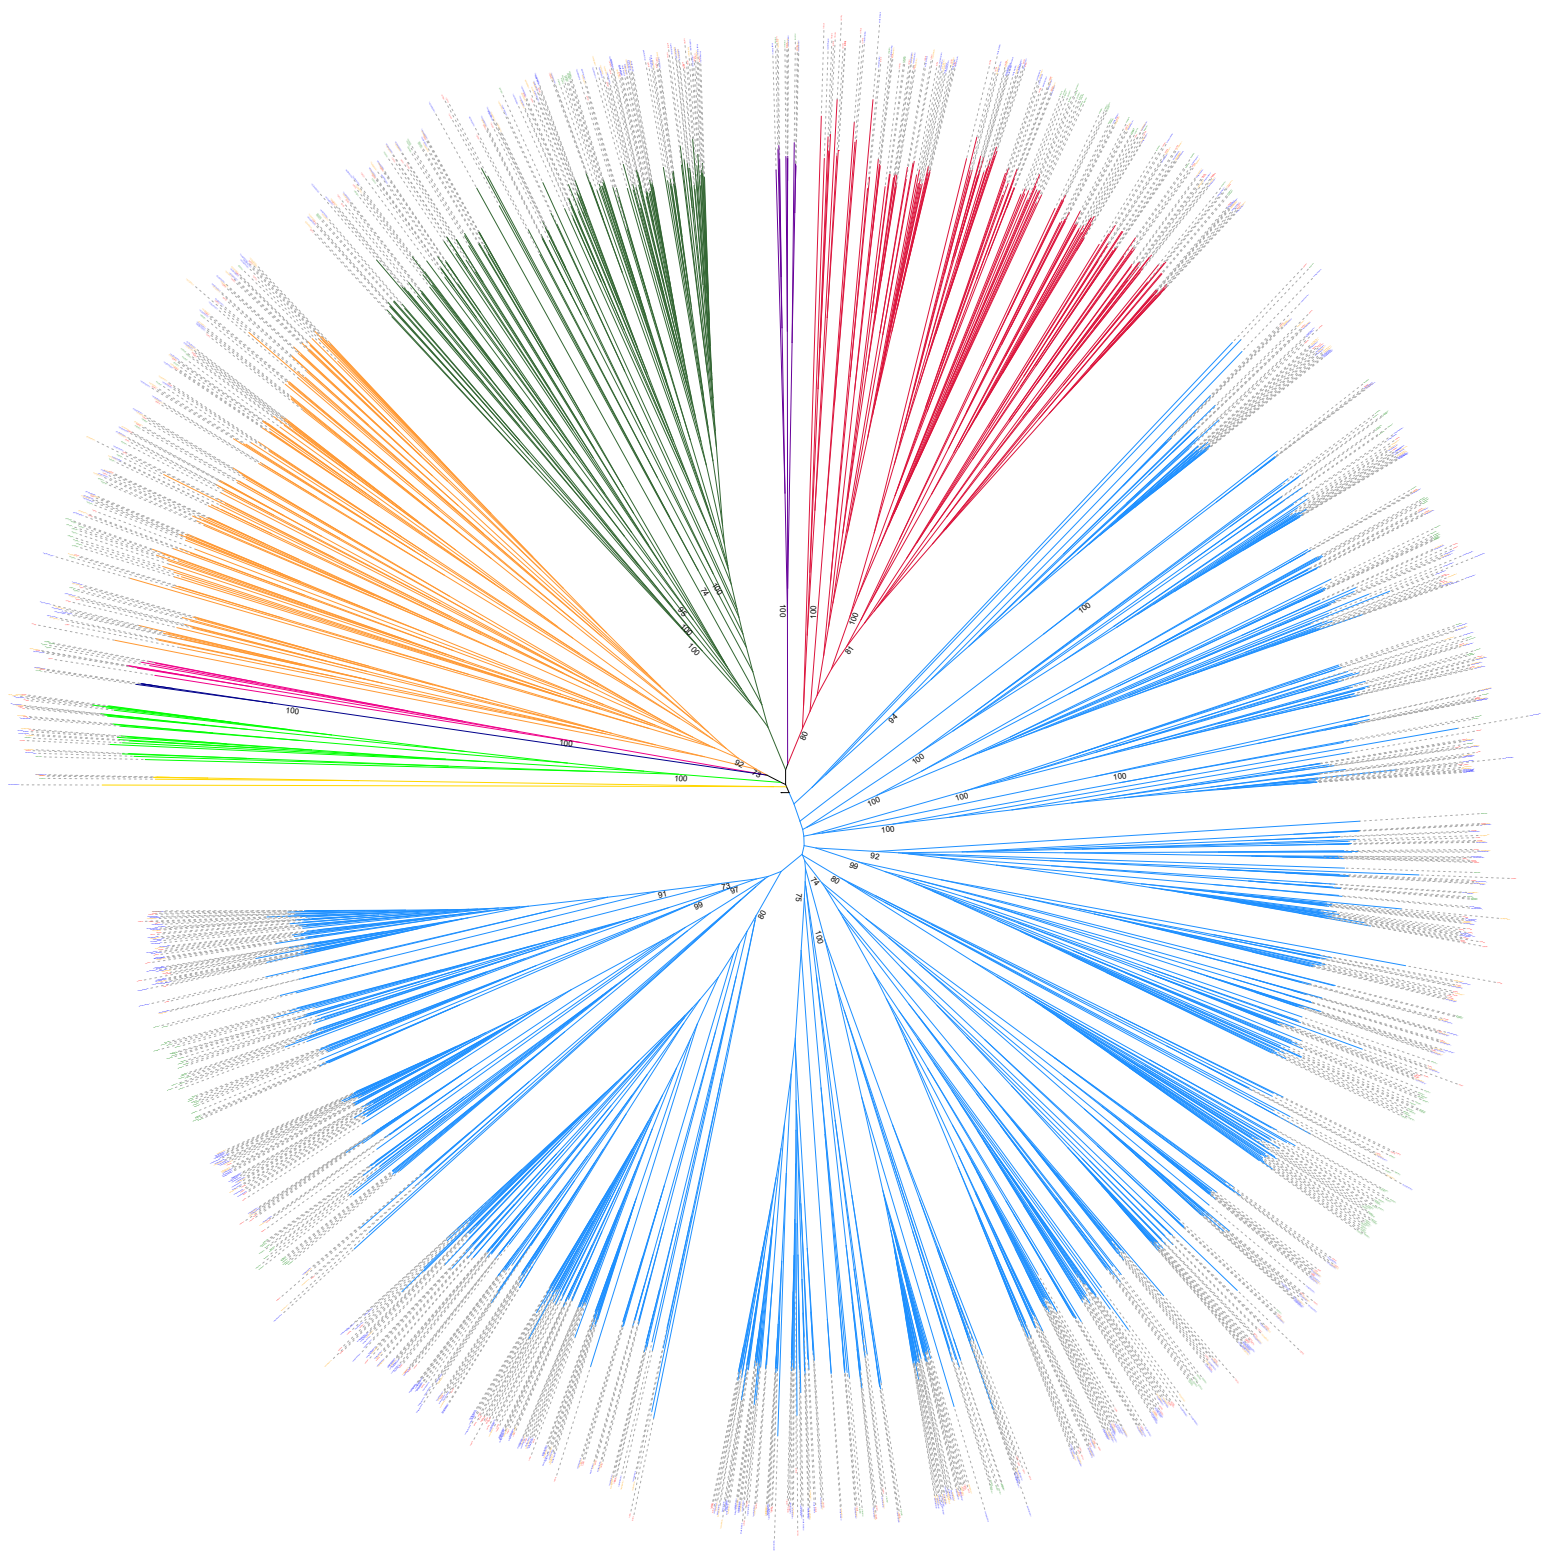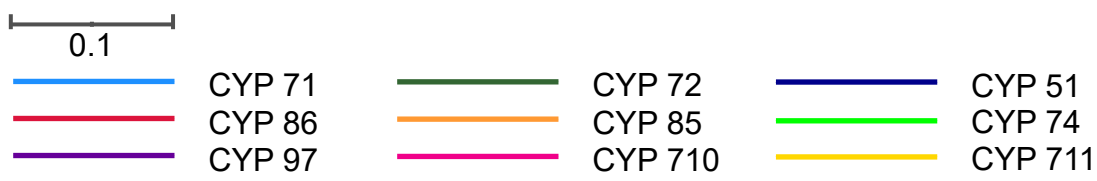

**Supplementary Figure 1** | Phylogenetic tree of P450 genes from 4 species. The gene in Arabidopsis are marked in green, the gene in capsicum are marked in red, the gene in tomato are marked in yellow, the gene in potato are marked in blue. The different color lines represents different clan.

| Motif | E-value   | Amino acid sequence composition of motif | Width |
|-------|-----------|------------------------------------------|-------|
| 1     | 6.2e-2052 | NDFEFJPFAGRRICPGINLA                     | 21    |
| 2     | 1.4e-1831 | LPYLKAVIKETLRLHPPVPLL                    | 21    |
| 3     | 2.7e-972  | VNVWAIGRDPKIWEB                          | 15    |
| 4     | 1.8e-1110 | FAGTDTTSTLEWAM                           | 15    |
| 5     | 4.6e-879  | PEEFKPERFLESDID                          | 15    |
| 6     | 1.5e-859  | EDCKVDGYTIPKGT                           | 15    |
| 7     | 2.8e-1112 | ELLKNPEVMKKAQEEIRZVVG                    | 21    |
| 8     | 9.0e-885  | AVVELALASLLHHFDWKLPNG                    | 21    |
| 9     | 8.5e-634  | SYNGKDIAFAPYGPYWRQ                       | 18    |

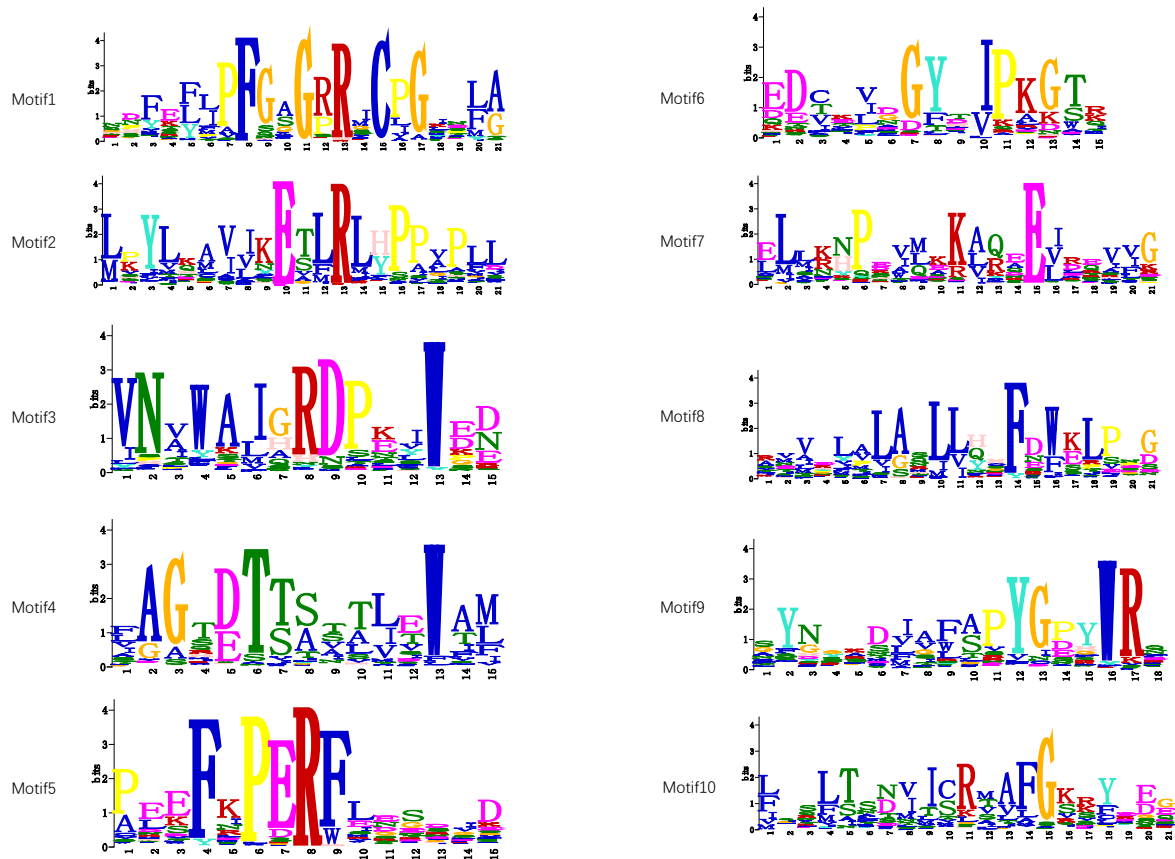

**Supplementary Figure 2** | The conserved motifs identified by MEME tools in CYP450 proteins.

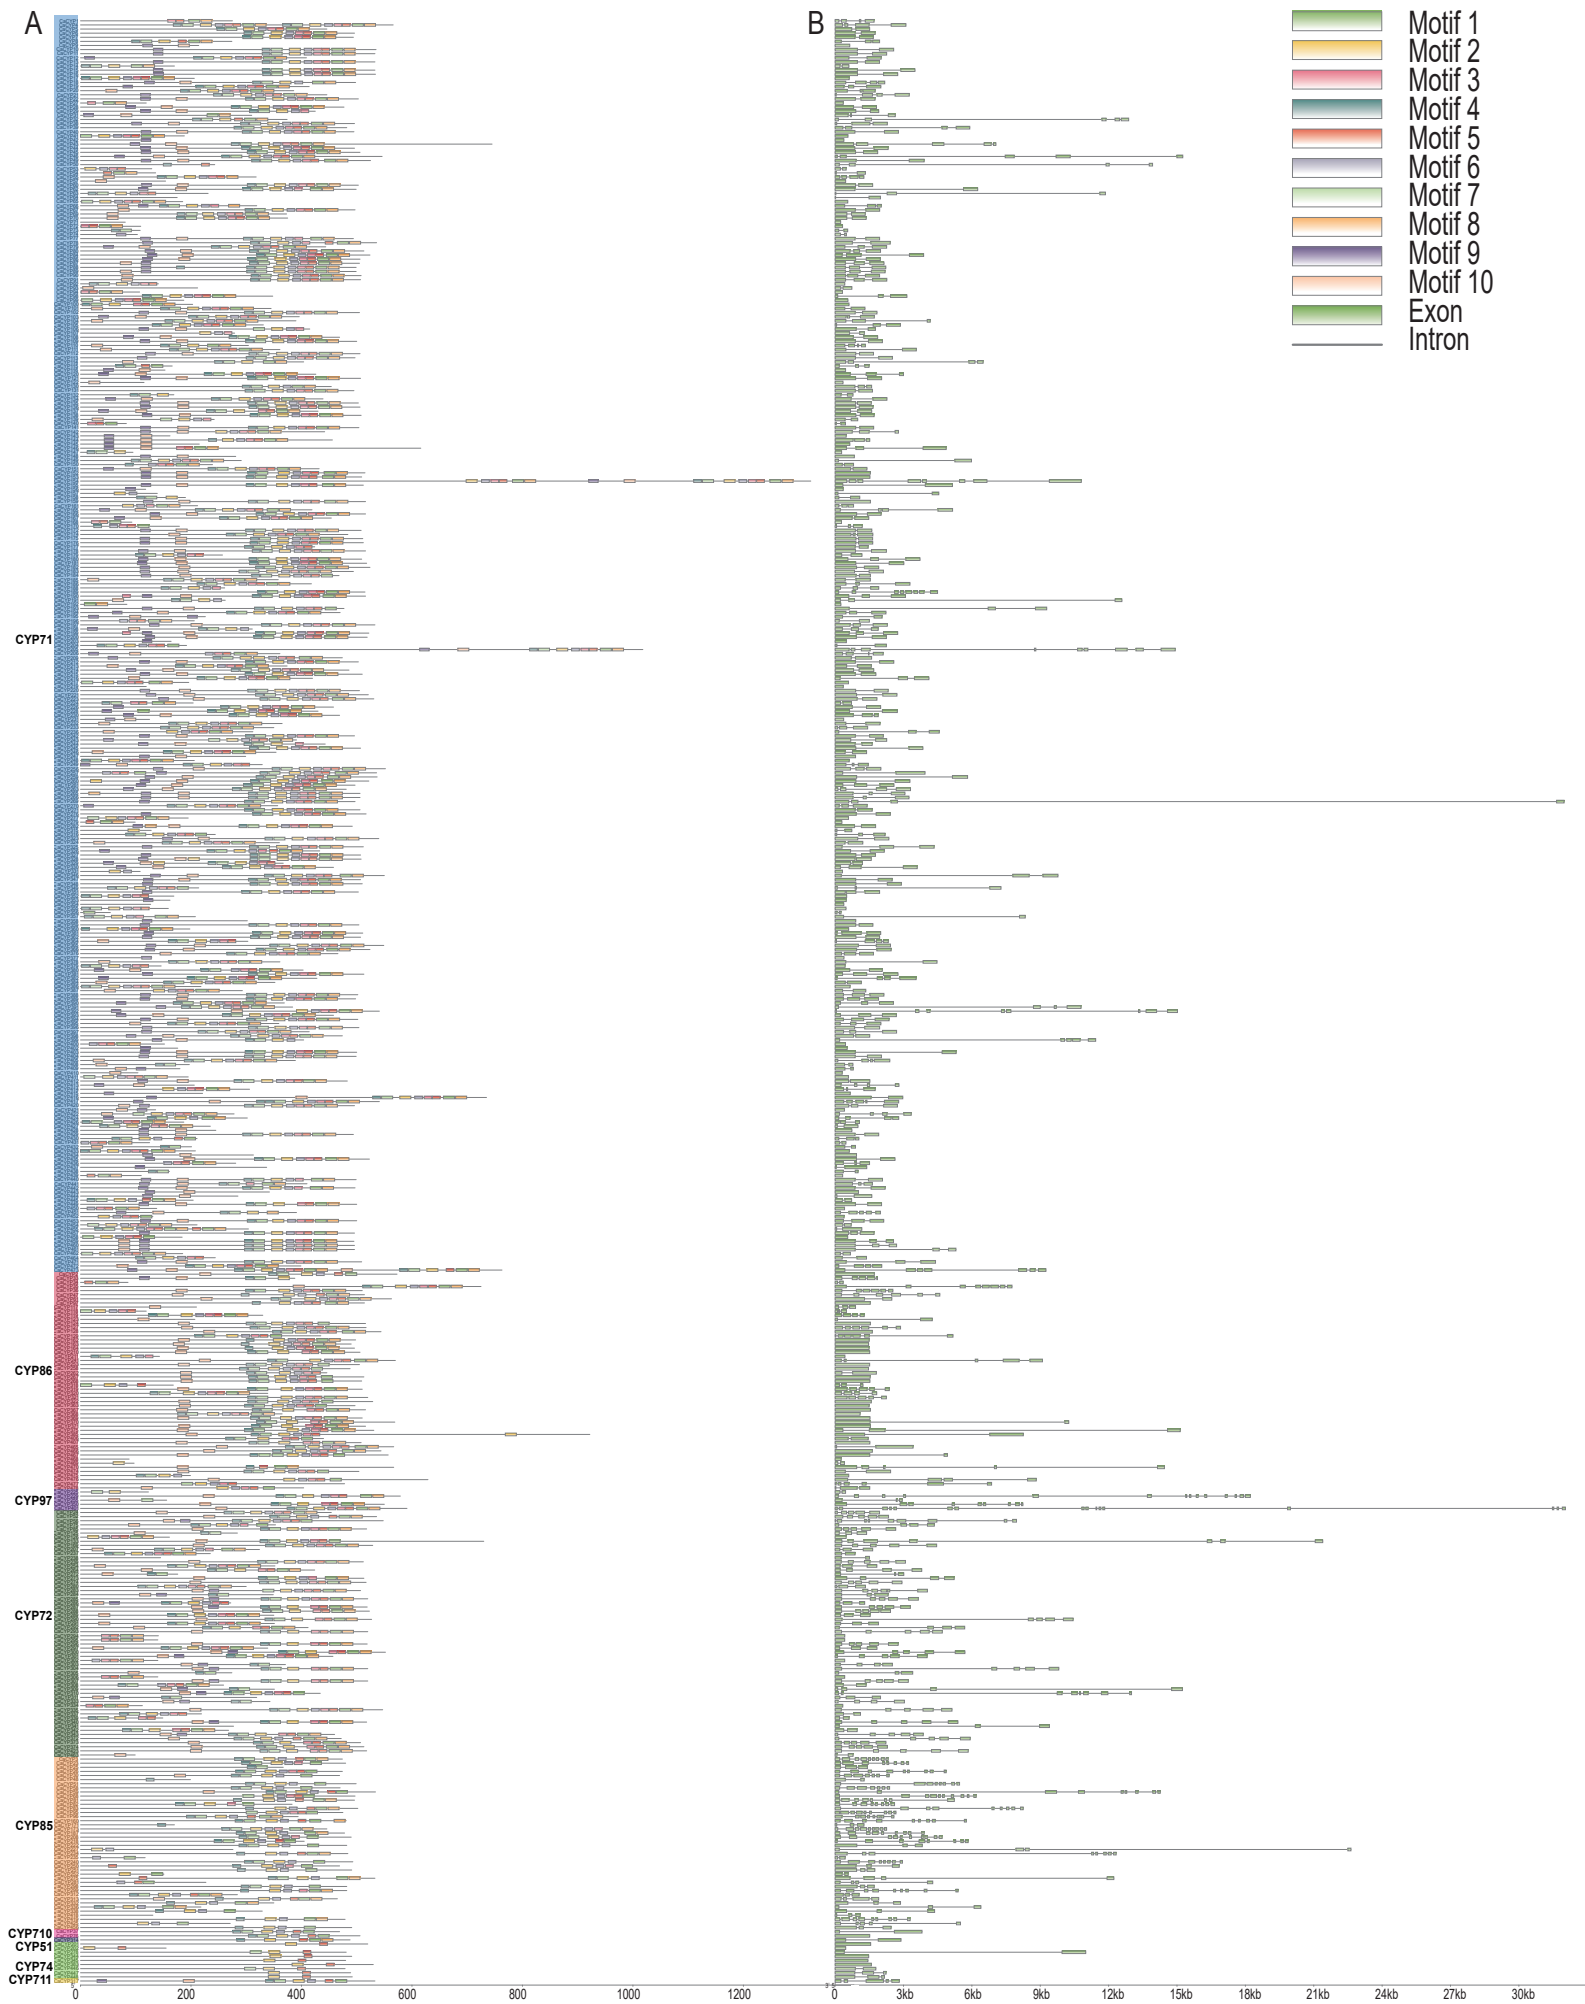

**Supplementary Figure 3|** Conserved motifs and gene structure of the P450 family in pepper. (A) Subfamily classification and protein motifs of CaCYP members. The nine main subfamilies are marked with different colors. The colorful boxes represent different motifs. Motif sequence are provided in Supplementary Figure 2. (B) Analysis of Gene structure. Green blocks represent exon and black dashed lines represent intron.

CYP71 clan

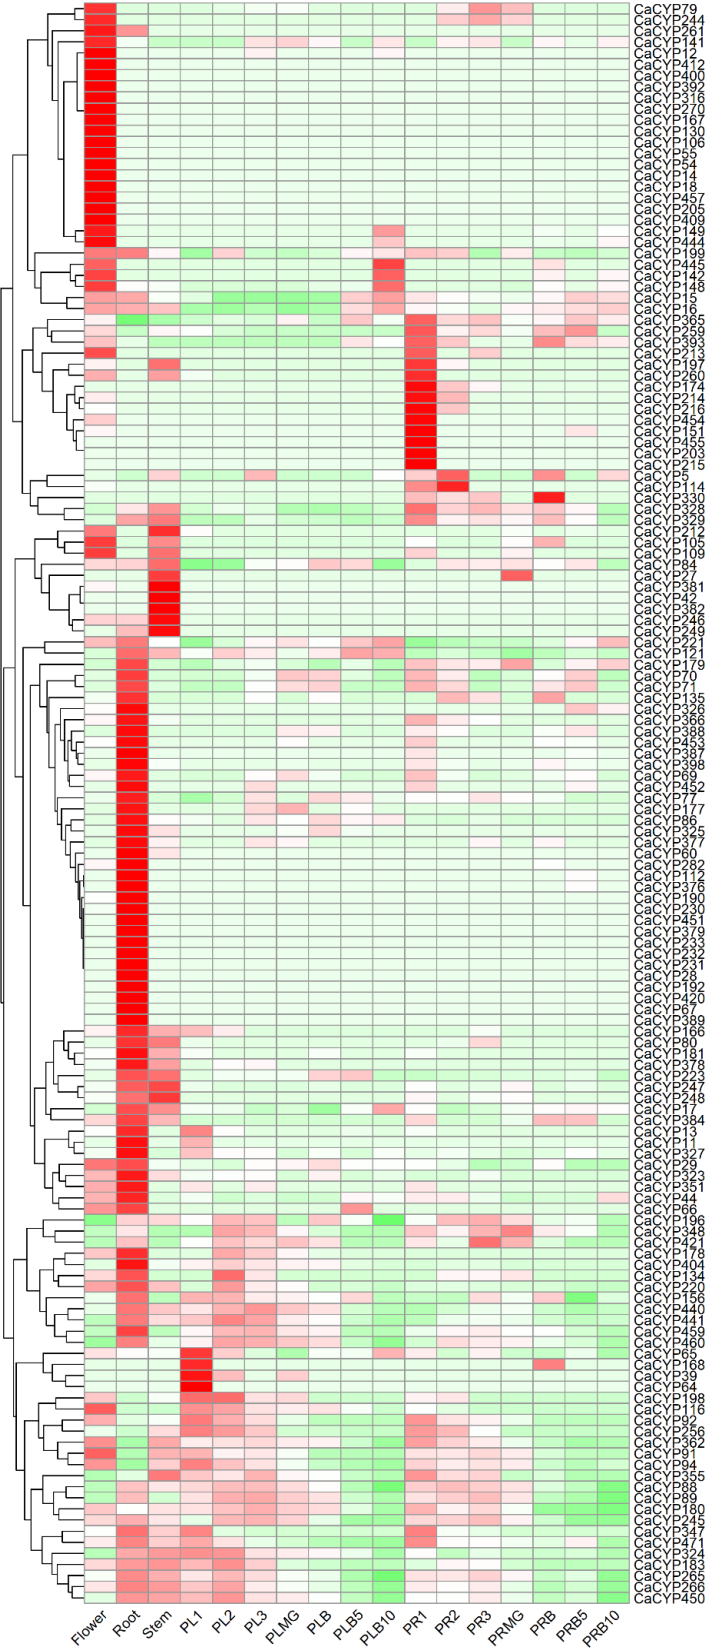

CYP72 clan

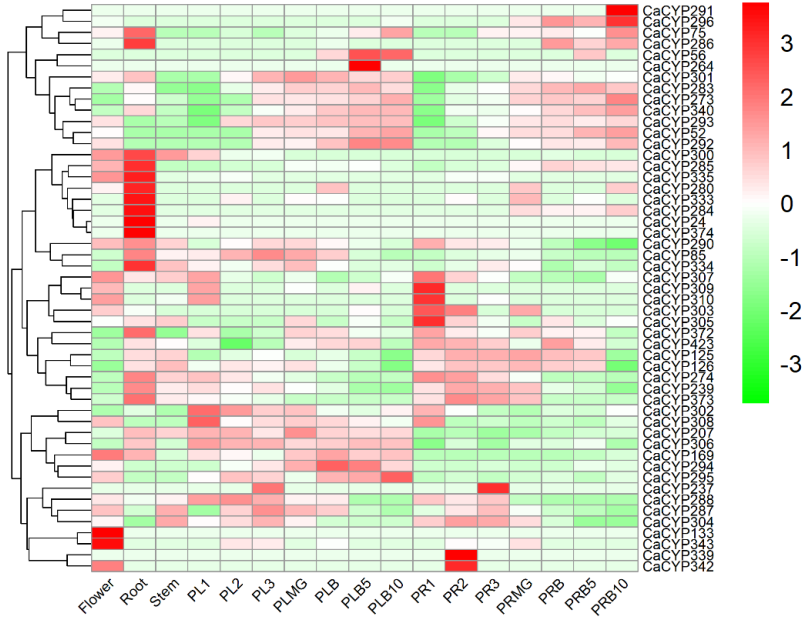

CYP85 clan

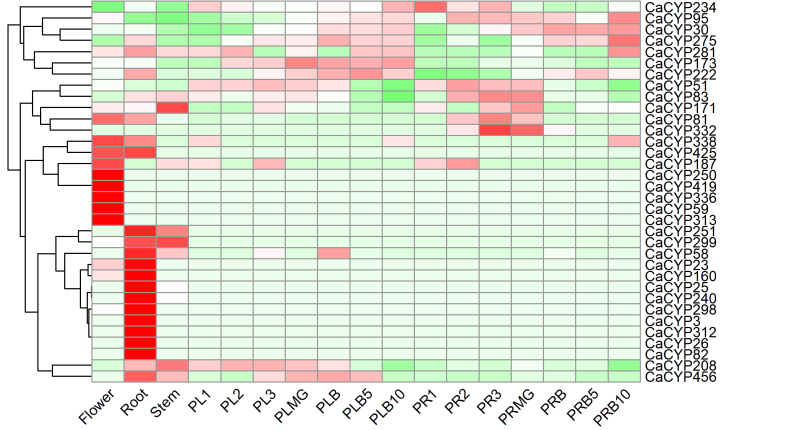

CYP86 clan

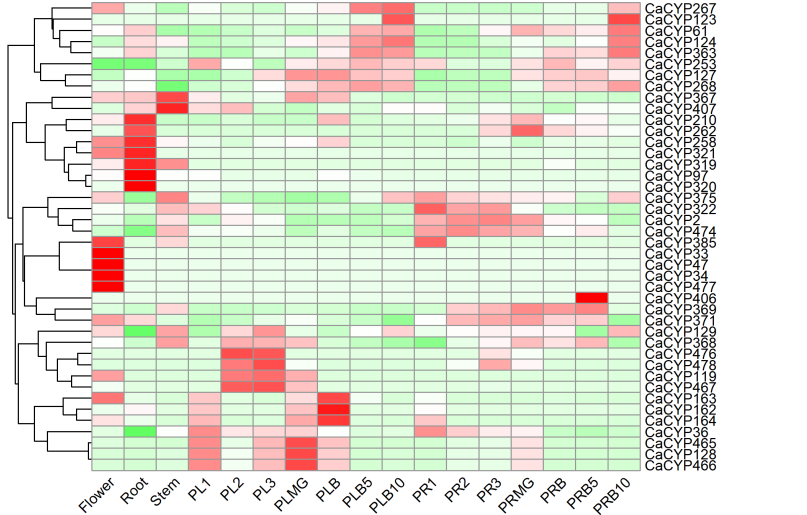

CYP74 clan

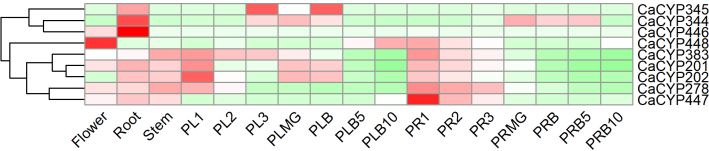

CYP97clan

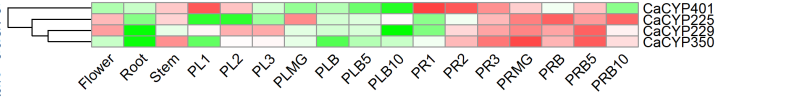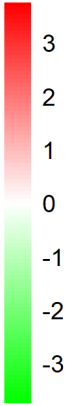

**Supplementary Figure 4|** Analysis of the expression patterns of remaining CaCYP genes in different tissues and fruit development stages, which is corresponding to Figure 5.

CYP71 clan

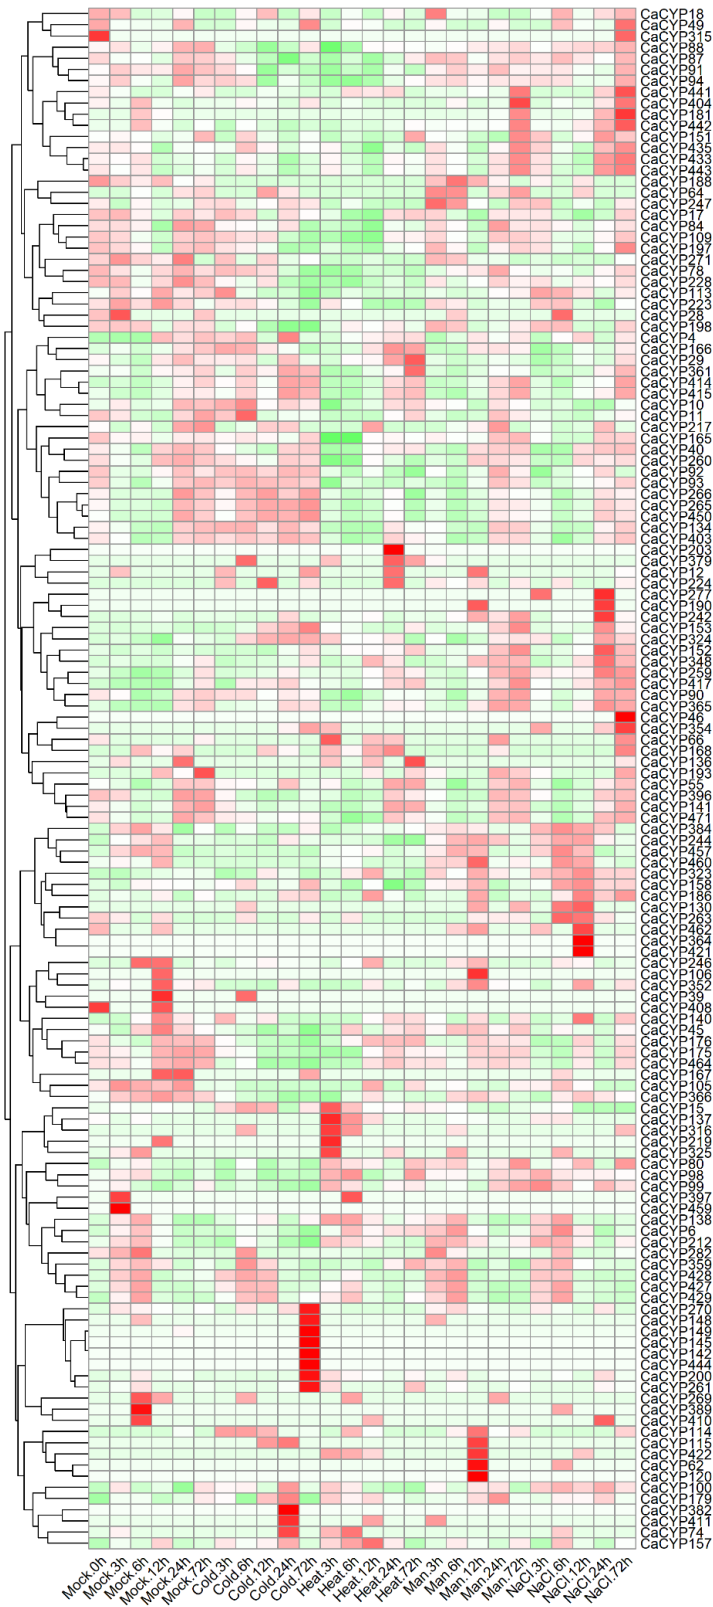

CYP72 clan

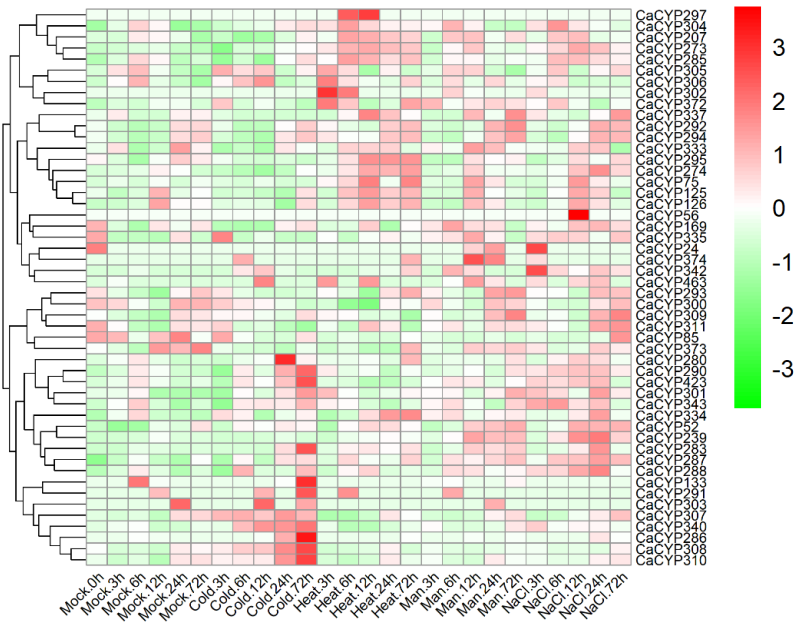

CYP85 clan

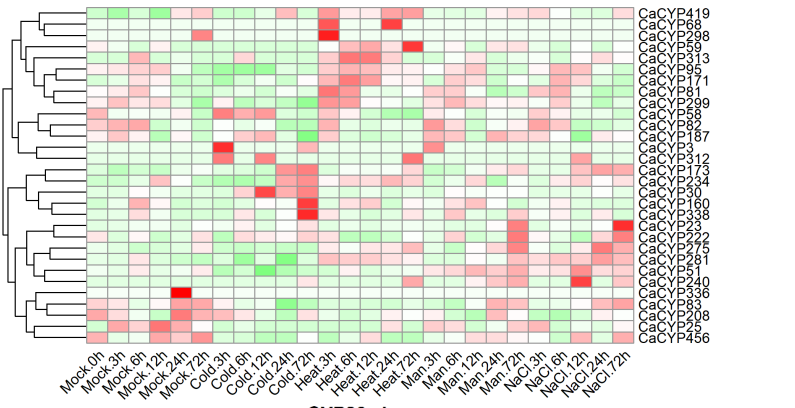

CYP86 clan

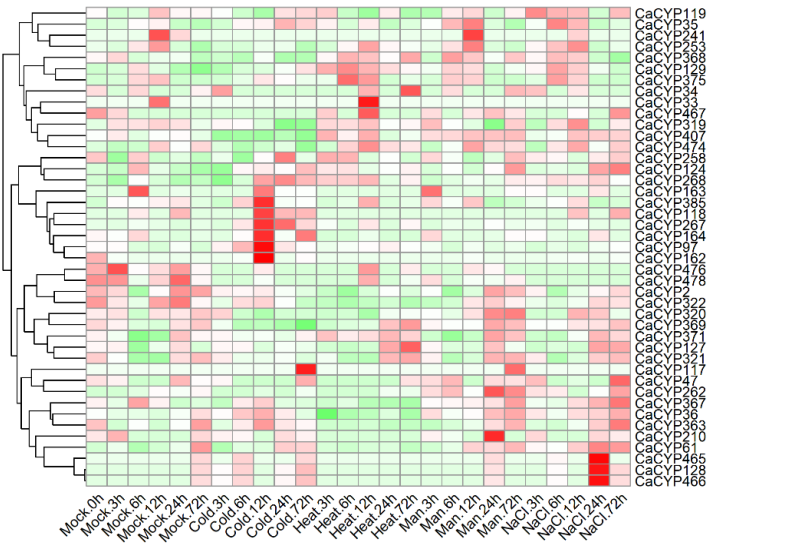

CYP74 clan

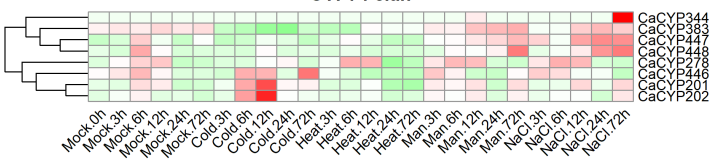

CYP97 clan

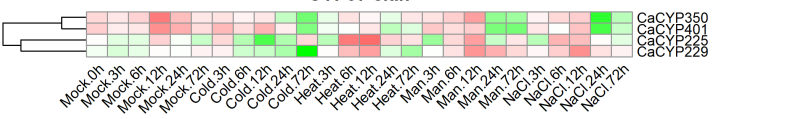

**Supplementary Figure 5** | Analysis of the expression patterns of remaining CaCYP genes in different abiotic stress, which is corresponding to Figure 6.



CYP71 clan

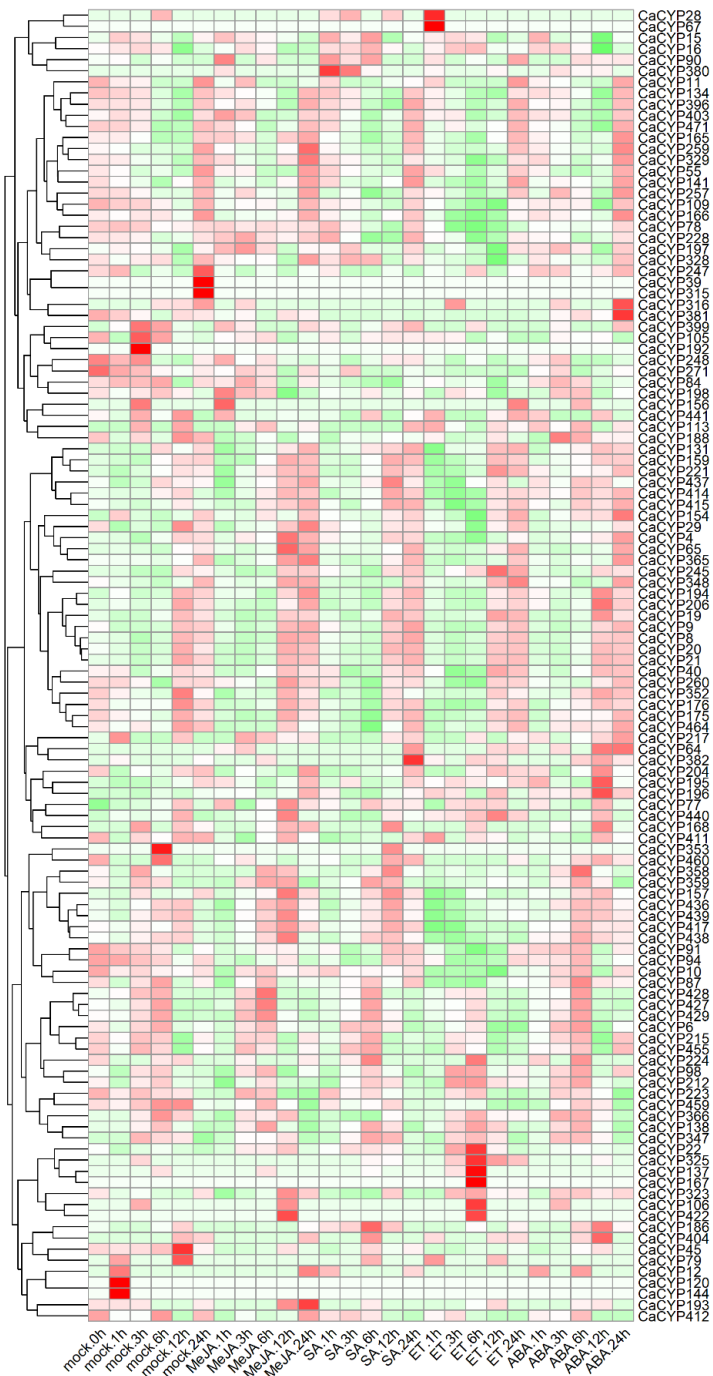

CYP72 clan

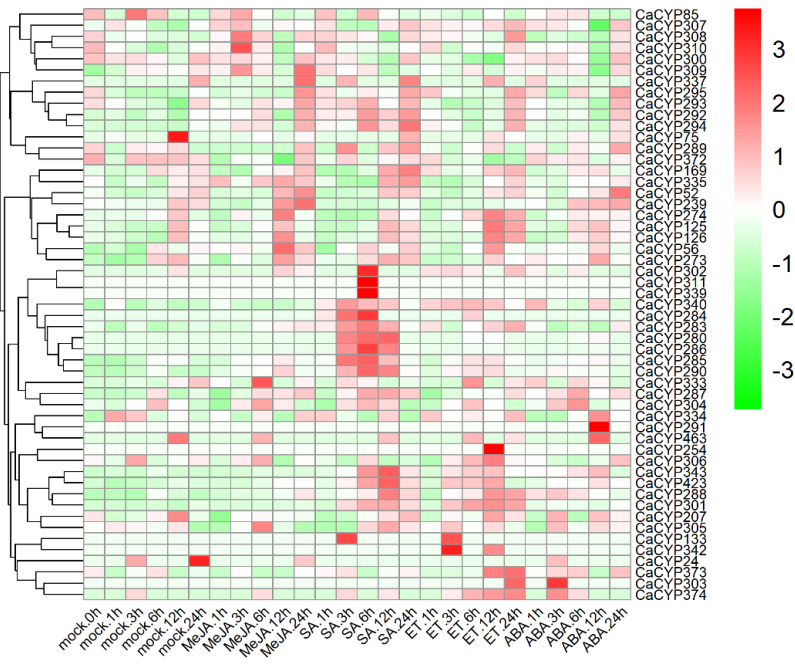

CYP85 clan

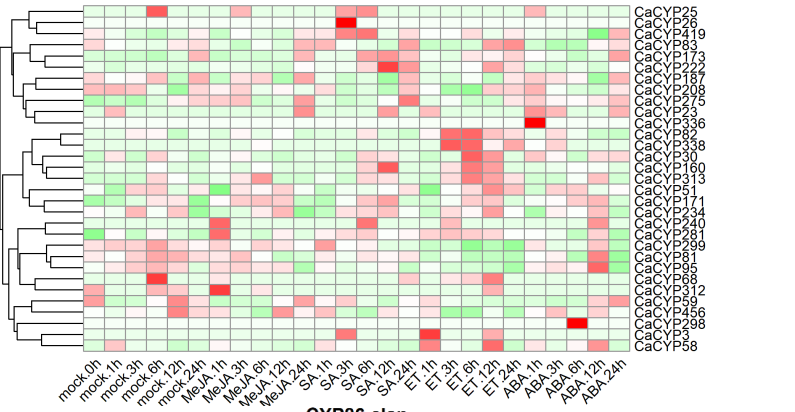

CYP86 clan

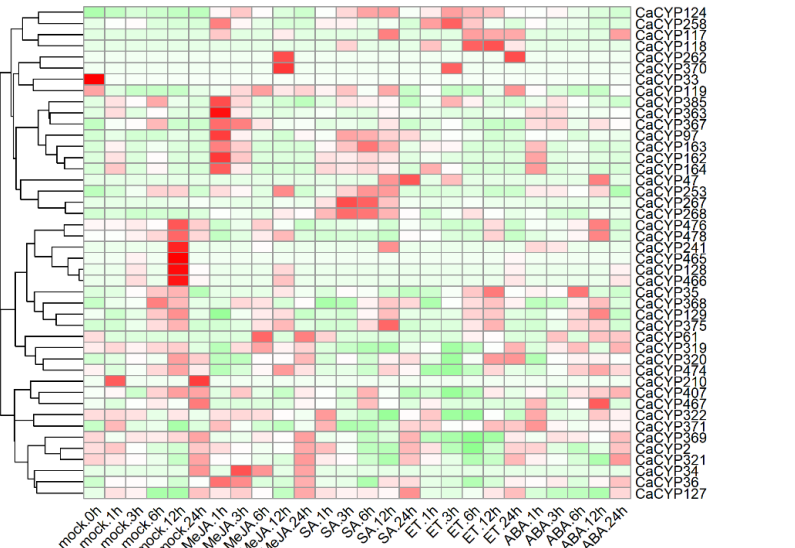

CYP74 clan

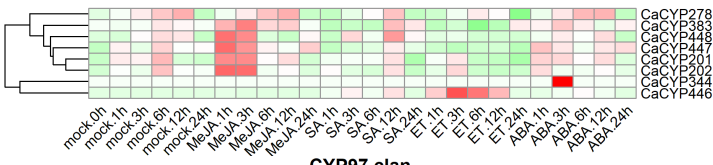

CYP97 clan

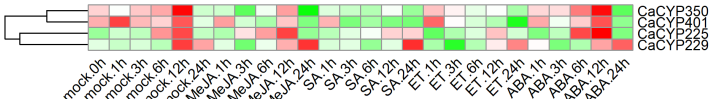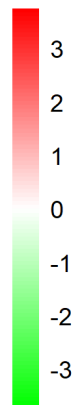

**Supplementary Figure 6** | Analysis of the expression patterns of remaining CaCYP genes in different phytohormone treatment, which is corresponding to Figure 8.

CYP71 clan

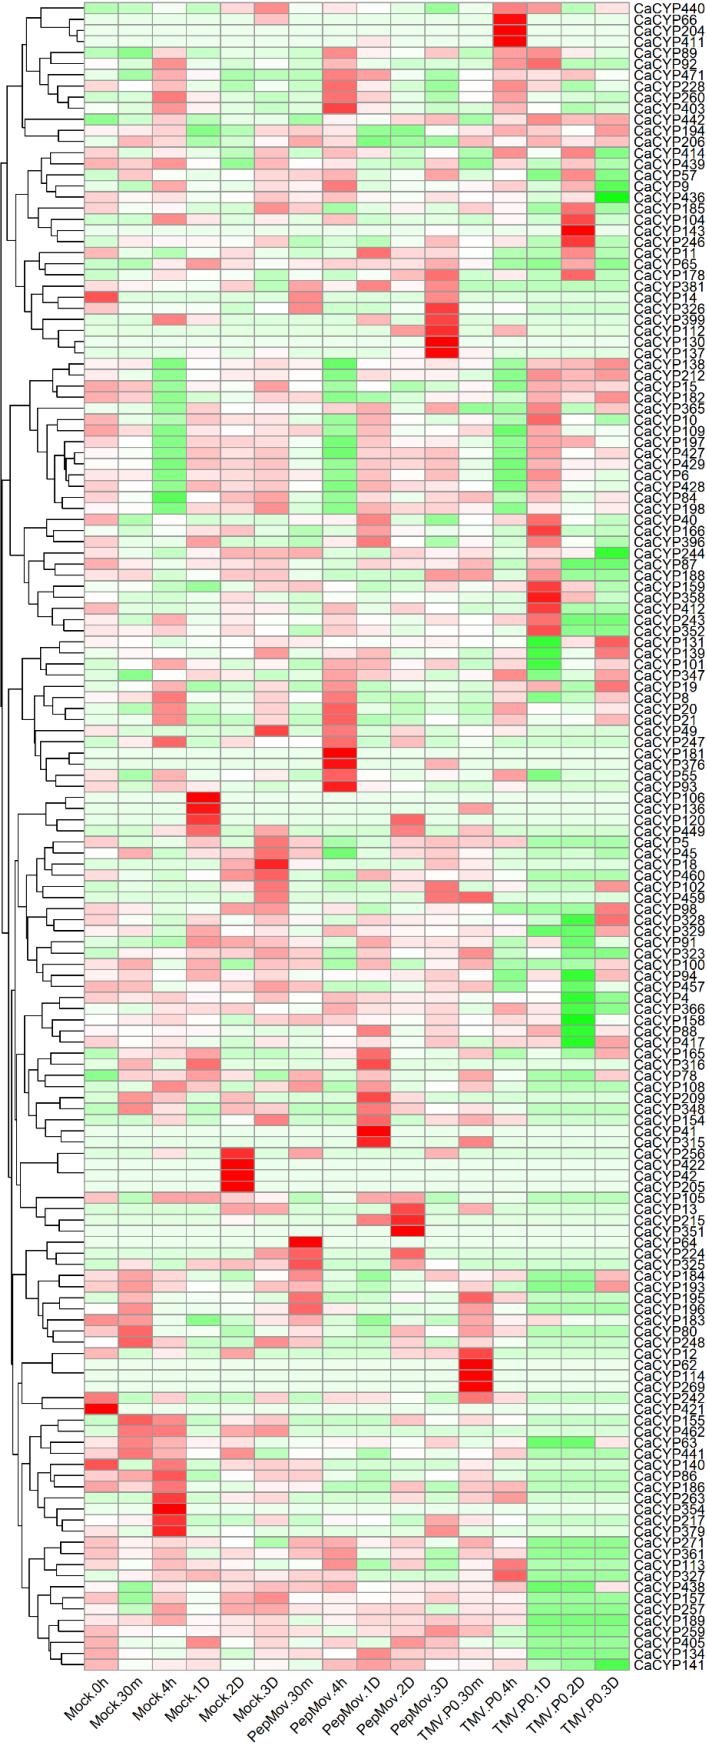

CYP72 clan

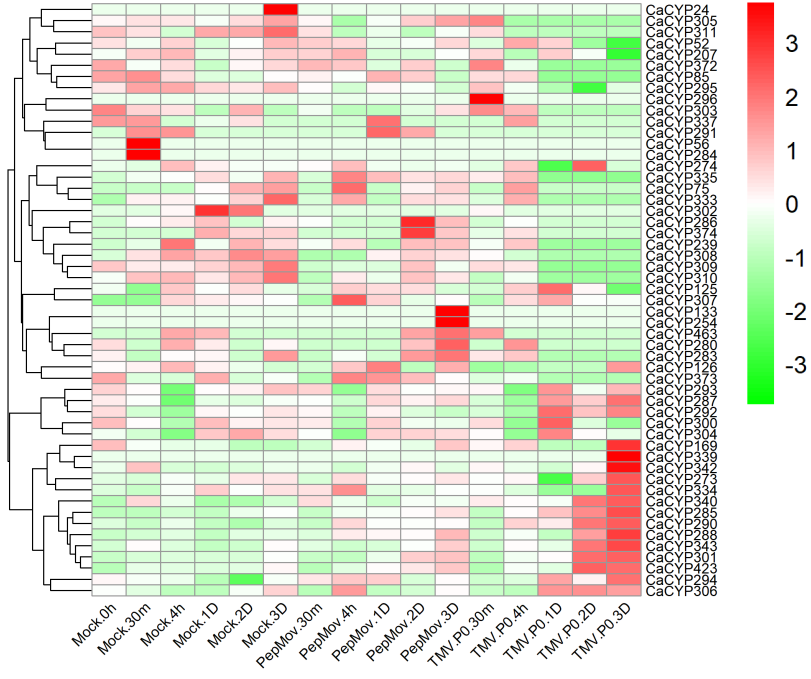

CYP85 clan

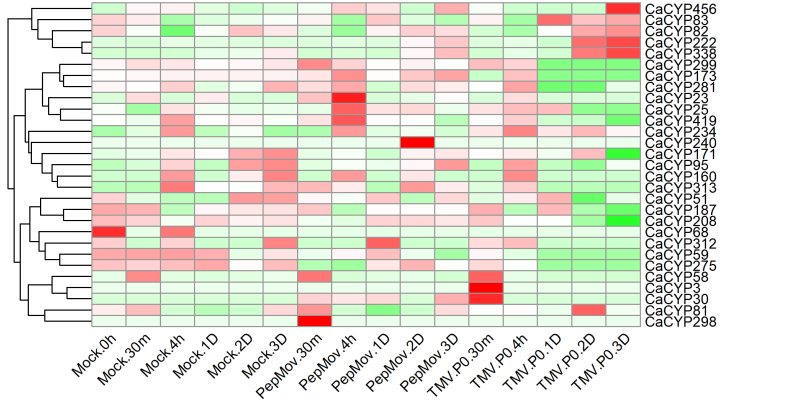

CYP86 clan

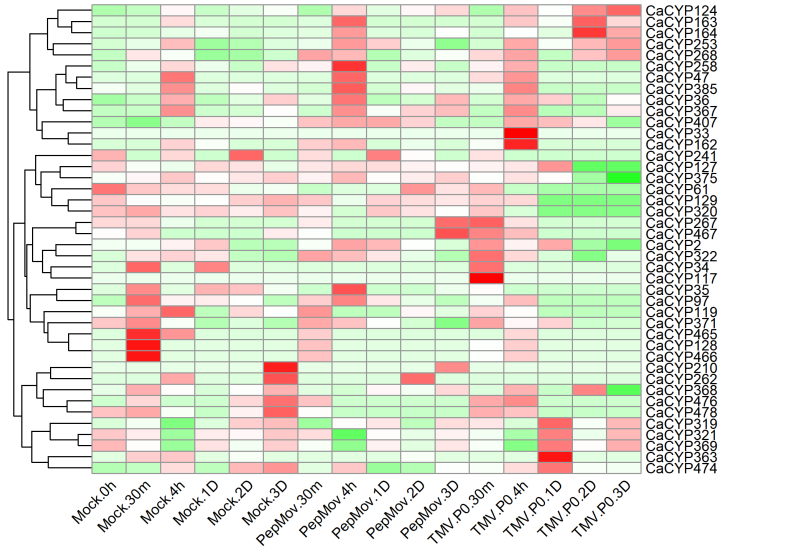

CYP74 clan

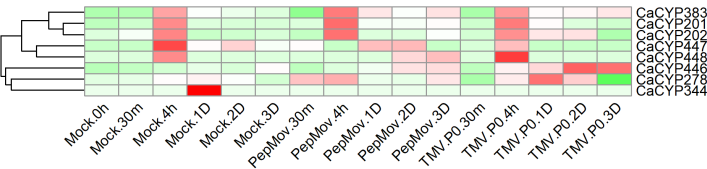

CYP97clan

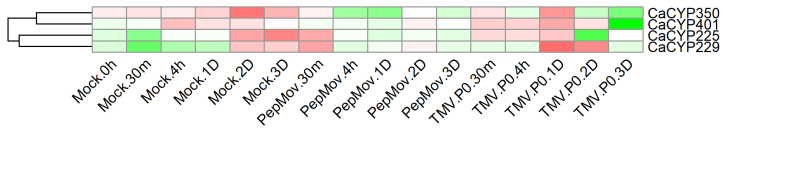

**Supplementary Figure 7** | Analysis of the expression patterns of remaining CaCYP Genes in different virus infections, which is corresponding to Figure 9.
